# Supplementary material
Source: PubMed Central journal article supplement (PMC2713586)
Supplement: neo1108_0732SD1.pdf [file neo1108_0732SD1.pdf]

## Supplemental Information

The complete list of proteins numbered from 1 to 77 in the graph of Figure 7 is the following (see also antibody list at: <http://www.sigmaaldrich.com/etc/medialib/docs/Sigma-Aldrich/Bulletin/mpaa3antibodylist.Par.0001.File.tmp/mpaa3antibodylist.pdf>): 1) phospho c-JUN (pS63); 2) serine/threonine PP2A/B $\alpha$ ; 3) serine/threonine PP2A/B' pan 2; 4) serine/threonine PP2A/B $\gamma$ ; 5) serine/threonine protein phosphatase 1 $\gamma$ 1; 6) serine/threonine protein phosphatase 2C $\alpha$ / $\beta$ ; 7) c-erbB-4 cl.HER4-36; 8) serine/threonine protein phosphatase 1 $\beta$ ; 9) c-erbB-3 cl.RTJ1; 10) serine/threonine PP2A/A; 11) MAPK, activated (diphosphorylated ERK-1 and 2) cl. MAPK-YT; 12) protein kinase C $\beta$ 1 cl.PK-B13; 13) MAPK (ERK-1, ERK-2); 14) p38 MAPK, activated diphosphorylated p38 clone P38-TY; 15) c-Jun N-terminal kinase (JNK1, JNK2); 16) vascular endothelial growth factor receptor 1; 17) S6 kinase; 18) MAPK, non-phosphorylated ERK cl.ERK-NP2; 19) c-erbB-2 clone HER2-96; 20) MEKK4 clone MEKK4-338; 21) phosphotyrosine clone pT-154; 22) protein kinase C $\alpha$ ; 23) MAPK kinase (MEK, MAPKK); 24) MAPK, monophosphorylated threonine clone ERK-YNP; 25) Ap-1; 26) MCL-1; 27) phosphatidylinositol 3-kinase (PI3-K, p85 $\alpha$ ); 28) phosphothreonine clone PTR-8; 29) MAPK kinase 4 (MKK4,

SEK1, JNKK1); 30) protein tyrosine phosphatase PEST clone AG25; 31) MAPK, monophosphorylated tyrosine clone ERK-PY193; 32) JNK, activated (diphosphorylated JNK) clone JNK-PT48; 33) Crk-L; 34) GAPDH clone GAPDH-71.1; 35) CRK-II; 36) ATF2; 37) phosphoserine clone PSR-45; 38) MAPK phosphatase 1 (MKP-1); 39) Sos1; 40) protein kinase C $\gamma$  clone PK-G4; 41) P130<sup>cas</sup>; 42) protein kinase C $\delta$ ; 43) MAPK (ERK-1); 44) MAPK, activated/monophosphorylated (phosphothreonine ERK-1 and 2) clone ERK-PT115; 45) c-CBL; 46) MAPK activated protein kinase 2 (MAKAPK2); 47) RSK1; 48) p38 MAPK; 49) protein phosphatase 1 $\alpha$ ; 50) estrogen receptor; 51) ERK5 (big MAPK, BMK1); 52) KSR clone C3H7D2; 53) ATF 1; 54) protein kinase C $\beta$ 1; 55) phospho ATF 2 (pThr69,71) clone ATF-22P; 56) SH-PTP2 (SHP-2); 57) ILK; 58) Grb-2 clone GRB-232; 59) RAF1; 60) phospholipase C $\gamma$ 1 (PLC $\gamma$ 1); 61) RAF1 clone RNP1; 62) protein kinase C $\beta$ 2 clone PK-B26; 63) protein kinase C $\epsilon$ ; 64) ILK clone 65; 65) epidermal growth factor receptor clone F4; 66) protein kinase C cl.MC5; 67) phospholipase A2; 68) secretory group V cl.MCL-3G1; 69) phospho c-JUN (pS73); 70) protein kinase C $\beta$ 2; 71) protein kinase C $\zeta$ ; 72) MAPK 2 (ERK-2) clone: 1B3B9; 73) protein kinase C $\eta$ ; 74) protein kinase C $\gamma$ ; 75) p38 MAPK, nonactivated clone P38-YNP; 76) SIRP $\alpha$ 1, MKK3 (SAPKK2, SKK2, MEK3); and 77) p38 $\gamma$  (SAPK3).

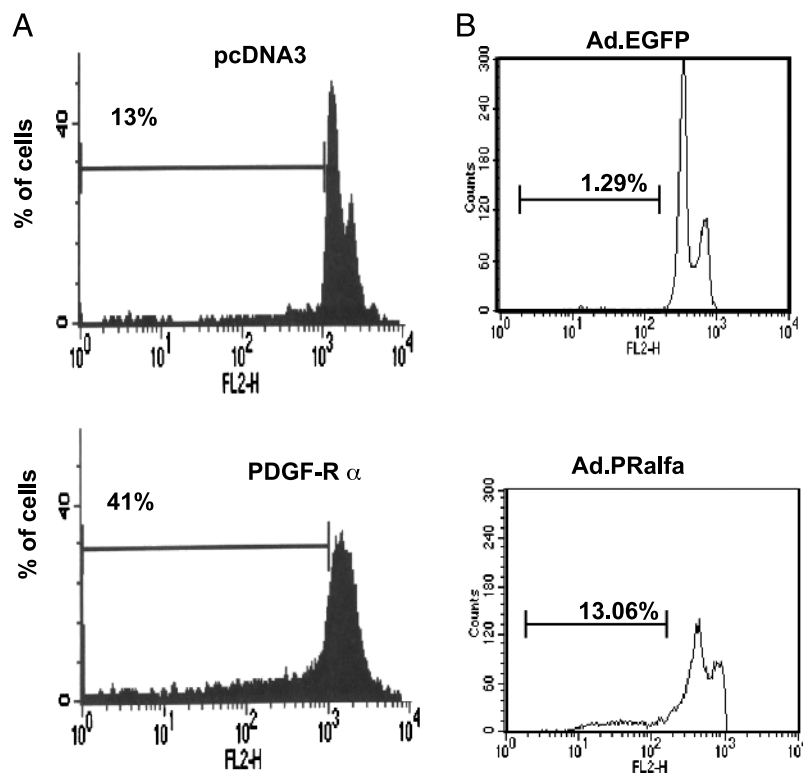

**Figure W1.** Propidium iodide incorporation analyzed by FACS analysis, in SK-MEL-110 cells transfected with pcDNA3 or PDGF-R $\alpha$  plasmid (A) or infected with AdCMV.EGFP or AdCMV.PDGFR- $\alpha$  (B).
